# Supplementary material for: Changes in Neonatal Morbidity and Neonatal Care Practices of Infants Born Very Preterm in the Netherlands in the 1980s and 2000s
Source: Research Square preprint supplement (doi:10.21203/rs.3.rs-627101/v1), 2021-06-22
Supplement: Supplementary file 1 [file 2749a784da530684cd7902df.xlsx]

## Sheet: Sheet1
	Harmonized label name	Harmonized definition	Entered into the harmonization process	Recoding required	Reason for exclusion
Variables with identical definitions and codes – no need for recoding
	infant characteristics
	Gestational age at birth (GA)	gestational age in weeks, completed weeks; based on clinical estimates on basis of last menstrual date or early ultrasound measurements.	x
	Birth weight (BW)	birth weight in grams	x
	Small for gestation (SGA)	birth weight below the 10th percentile for the gestational age, using Dutch perinatal growth charts	x
	Sex	sex of the child/cohort member: 1=male; 2=female; 3=other	x
	maternal characteristics
	Age of the mother at birth	maternal age at birth in years	x
	prenatal risk factors
	Smoking during pregnancy	any smoking during pregnancy: 0= no smoking, 1= smoking	x
	Obstetrical care practices
	Cesarean section	mode of delivery: 0=vaginal, 1= caesarean section	x
	PPROM	Prolonged premature rupture of membranes (more than 24 h before delivery): 0= no pprom, 1= pprom	x
	Neonatal morbidity
	Early or late sepsis	Early or late sepsis with positive blood culture result or clinical symptoms, 0=no, 1=yes	x
	Apnea	apnea occurred: 0=no, 1=yes	x
	Neonatal care practices
	CPAP	Continuous positive airway pressure for longer than initial stabilization in the delivery room only: 0=no, 1=yes	x
	Mechanical ventilation	Mechanical ventilation for a longer duration than initial stabilization in the delivery room only: 0=no, 1=yes	x
	Lengths of mechanical ventillation	duration of mechanical ventilation in days	x
	Caffeine therapy	Treatment with caffeine for apnea: 0=no, 1=yes	x
	Postnatal corticosteroids	postnatal corticosteroids, dexamethasone or hydrocort: 0=no, 1=yes	x
	Length of stay in NICU	number of days in NICU	x
	Length of stay in hospital	number of days in hospital	x
Variables with similar definition or codes – some recoding required for harmonisation
	infant characteristics
	Multiples	number of children born from the same pregnancy: 0=singleton, 1=multiple	x	LOLLIPOP: category reduction
	maternal characteristics
	Education of parents	parent education level at birth (ISCED): highest level combining maternal and paternal education: 0=low, 1=medium, 2=high	x	LOLLIPOP: category reduction, 2 categories merging; POPS: category reduction
	prenatal risk factors
	Previous birth	previous pregnancies lasting >16 weeks	x	POPS: from continuous variabe to categorical variable
	Obstetrical care practices
	Breech presentation	delivery presentation: 0=head,1=breech or other	x	both cohorts: category reduction
	Meconium contained in amniotic fluid	meconium contained in amniotic fluid: 0=no, 1=yes	x	both cohorts: category reduction
	Apgar score by 5 minutes <7	Apgar score by 5 minutes: 0= <7, 1= >=7	x
	Neonatal morbidity
	Intraventricular hemorrhage (IVH) grade III-IV	intraventricular haemorrhage grades 3 and 4: 0=no ivh or grades 1-2, 1= ivh grades 3-4, POPS: only used from those neonatal intensive care units that performed ultrasound of the brain routinely and systematically	x	POPS: merging more variables
	Necrotising Enterocolitis (NEC)	proven necrotising enterocolitis,0=no or suspected, 1=X-ray proved or surgery	x	both cohorts: category reduction
	Neonatal care practices
	Postnatal corticosteroids	postnatal corticosteroids, dexamethasone or hydrocort: 0=no, 1=yes	x	LOLLIPOP: category reduction
Variables not eligible for the harmonisation
	infant characteristics
	Head circumference at birth				not used in the present study
	Length at birth				no data in LOLLIPOP
	maternal characteristics
	Dummy variable: High socio-economic status				diverse definitions: high/low SES (LOLLIPOP) vs 7 SES categories without label (POPS)
	one parent family				diverse definitions: one parent family (LOLLIPOP) vs. marital status as cohabiting/not (POPS)
	ethnicity				diverse definitions: born in the NL/not (LOLLIPOP) vs races (POPS)
	chronic somatic illness				diverse definitions: group of autoimmune, renal, cardiac, lung (LOLLIPOP) vs separately only renal and cardiac (POPS)
	prenatal risk factors
	Diabetes				deleted after preliminary analysis, prevalence of diabetes in LOLLIPOP seems to be unrealistic in the practice (2.5%) → prevalence of gestational diabetes is about 5 % in Europe.
	HELLP or (pre)eclampsia				diverse definitions: group of hemolysis, elevated liver enzymes, low Platelet count syndrome (LOLLIPOP) or (pre)eclampsia vs. (pre)eclampsia/no (POPS)
	Infection				not clear definitions (maternal, infant, both)
	Obstetrical care practices
	full course of antenatal corticosteroids				information provided only in LOLLIPOP
	Neonatal morbidity
	Bronchopulmonary Dysplasia (BPD)				Different definitions: additional O2 needed after >36 weeks postpartum (LOLLIPOP) or 28 days of life (POPS)
	hyperbilirubinaemia				deleted after initial analysis because of very low rates in both cohorts (6.2% and 21.8%)
	Neonatal care practices
	NICU transportation				Comparison could not be reliable because the health system and hospital-levels have been restructured during the 1990s
	number of days of CPAP				too many missing cases in LOLLIPOP
	Phototherapy treatment and/or exchange transfusion				deleted after initial analysis, s. hyperbilirubinaemia
	Surfactant				information provided only in LOLLIPOP
